# Supplementary material for: Highly Efficient and Mild Gold (I) Catalyzed Synthesis of 3,8-Diarylidene-2,7-dioxaspiro[4.4]nonane-1,6-diones
Source: MDPI journal article supplement (doi:10.3390/molecules28010300), 2022-12-30
Supplement: s1 [file s1]

# Highly efficient and mild Gold (I) catalyzed synthesis of 3,8-diarylidene-2,7-dioxaspiro[4.4]nonane-1,6-diones

Antonia Iazzetti<sup>1</sup>, Dario Allevi<sup>1</sup>, Andrea Calcaterra<sup>2,\*</sup>, Giancarlo Fabrizi<sup>2</sup>, Antonella Goggiamani<sup>2</sup>, Giulia Mazzocanti<sup>2</sup>, Alessio Sferrazza<sup>2,†</sup>, Rosanna Verdiglione<sup>2</sup>, Valeria Vergine<sup>2</sup>

<sup>1</sup> Dipartimento di Scienze Biotechnologiche di Base Cliniche Intensivologiche e Perioperatorie, Università Cattolica del Sacro Cuore, Campus di Roma, Largo Francesco Vito 1, 00168 Rome, Italy

<sup>2</sup> Department of Chemistry and Technology of Drugs, Sapienza – University of Rome, P.le Aldo Moro 5, 00185 Rome, Italy

<sup>†</sup> Alessio Sferrazza is currently a research scientist at IRBM S.p.A., Medicinal Chemistry Department, Via Pontina km 30, n. 600, 00071 Pomezia (Rome), Italy

\* Correspondence: Andrea Calcaterra, e-mail: andrea.calcaterra@uniroma1.it

Index:

|                                                                                                                                   | Pag. |
|-----------------------------------------------------------------------------------------------------------------------------------|------|
| <b>Figure S1.</b> <sup>1</sup> H NMR of 3,8-dibenzylidene-2,7-dioxaspiro[4.4]nonane-1,6-dione ( <b>5a</b> )                       | S3   |
| <b>Figure S2.</b> <sup>13</sup> C NMR of 3,8-dibenzylidene-2,7-dioxaspiro[4.4]nonane-1,6-dione ( <b>5a</b> )                      | S3   |
| <b>Figure S3.</b> <sup>1</sup> H NMR of 3,8-dimethylene-2,7-dioxaspiro[4.4]nonane-1,6-dione ( <b>5b</b> )                         | S4   |
| <b>Figure S4.</b> <sup>13</sup> C NMR of 3,8-dimethylene-2,7-dioxaspiro[4.4]nonane-1,6-dione ( <b>5b</b> )                        | S4   |
| <b>Figure S5.</b> <sup>1</sup> H NMR of 3,8-bis(4-methoxybenzylidene)-2,7-dioxaspiro[4.4]nonane-1,6-dione ( <b>5c</b> )           | S5   |
| <b>Figure S6.</b> <sup>13</sup> C NMR of 3,8-bis(4-methoxybenzylidene)-2,7-dioxaspiro[4.4]nonane-1,6-dione ( <b>5c</b> )          | S5   |
| <b>Figure S7.</b> <sup>1</sup> H NMR of 3-benzylidene-8-(3-methoxybenzylidene)-2,7-dioxaspiro[4.4]nonane-1,6-dione ( <b>5d</b> )  | S6   |
| <b>Figure S8.</b> <sup>13</sup> C NMR of 3-benzylidene-8-(3-methoxybenzylidene)-2,7-dioxaspiro[4.4]nonane-1,6-dione ( <b>5d</b> ) | S6   |
| <b>Figure S9.</b> <sup>1</sup> H NMR of 3-(4-acetylbenzylidene)-8-benzylidene-2,7-dioxaspiro[4.4]nonane-1,6-dione ( <b>5e</b> )   | S7   |
| <b>Figure S10.</b> <sup>13</sup> C NMR of 3-(4-acetylbenzylidene)-8-benzylidene-2,7-dioxaspiro[4.4]nonane-1,6-dione ( <b>5e</b> ) | S7   |
| <b>Figure S11.</b> <sup>1</sup> H NMR of 3,8-bis(4-methylbenzylidene)-2,7-dioxaspiro[4.4]nonane-1,6-dione ( <b>5f</b> )           | S8   |
| <b>Figure S12.</b> <sup>13</sup> C NMR of 3,8-bis(4-methylbenzylidene)-2,7-dioxaspiro[4.4]nonane-1,6-dione ( <b>5f</b> )          | S8   |
| <b>Figure S13.</b> <sup>1</sup> H NMR of 3,8-bis(naphthalen-1-ylmethylene)-2,7-dioxaspiro[4.4]nonane-1,6-dione ( <b>5g</b> )      | S9   |
| <b>Figure S14.</b> <sup>1</sup> H NMR of 3,8-bis(naphthalen-1-ylmethylene)-2,7-dioxaspiro[4.4]nonane-1,6-dione ( <b>5g</b> )      | S9   |
| <b>Figure S15.</b> <sup>1</sup> H NMR of 3,8-bis(3-methoxybenzylidene)-2,7-dioxaspiro[4.4]nonane-1,6-dione ( <b>5h</b> )          | S10  |
| <b>Figure S16.</b> <sup>13</sup> C NMR of 3,8-bis(3-methoxybenzylidene)-2,7-dioxaspiro[4.4]nonane-1,6-dione ( <b>5h</b> )         | S10  |
| <b>Figure S17.</b> <sup>1</sup> H NMR of 3,8-bis(4-bromo-3-fluorobenzylidene)-2,7-dioxaspiro[4.4]nonane-1,6-dione ( <b>5i</b> )   | S11  |

|                    |                                                                                                                           |     |
|--------------------|---------------------------------------------------------------------------------------------------------------------------|-----|
| <b>Figure S18.</b> | <sup>13</sup> C NMR of 3,8-bis(4-bromo-3-fluorobenzylidene)-2,7-dioxaspiro[4.4]nonane-1,6-dione ( <b>5i</b> )             | S11 |
| <b>Figure S19.</b> | <sup>1</sup> H NMR of 3,8-bis(4-chlorobenzylidene)-2,7-dioxaspiro[4.4]nonane-1,6-dione ( <b>5j</b> )                      | S12 |
| <b>Figure S20.</b> | <sup>13</sup> C NMR of 3,8-bis(4-chlorobenzylidene)-2,7-dioxaspiro[4.4]nonane-1,6-dione ( <b>5j</b> )                     | S12 |
| <b>Figure S21.</b> | <sup>1</sup> H NMR of 3,8-bis(4-bromobenzylidene)-2,7-dioxaspiro[4.4]nonane-1,6-dione ( <b>5k</b> )                       | S13 |
| <b>Figure S22.</b> | <sup>13</sup> C NMR of 3,8-bis(4-bromobenzylidene)-2,7-dioxaspiro[4.4]nonane-1,6-dione ( <b>5k</b> )                      | S13 |
| <b>Figure S23.</b> | <sup>1</sup> H NMR of 3,8-bis(2-methyl-5-nitrobenzylidene)-2,7-dioxaspiro[4.4]nonane-1,6-dione ( <b>5l</b> )              | S14 |
| <b>Figure S24.</b> | <sup>13</sup> C NMR of 3,8-bis(2-methyl-5-nitrobenzylidene)-2,7-dioxaspiro[4.4]nonane-1,6-dione ( <b>5l</b> )             | S14 |
| <b>Figure S25.</b> | <sup>1</sup> H NMR of 3-(4-chlorobenzylidene)-8-(4-methoxybenzylidene)-2,7-dioxaspiro[4.4]nonane-1,6-dione ( <b>5m</b> )  | S15 |
| <b>Figure S26.</b> | <sup>13</sup> C NMR of 3-(4-chlorobenzylidene)-8-(4-methoxybenzylidene)-2,7-dioxaspiro[4.4]nonane-1,6-dione ( <b>5m</b> ) | S15 |
| <b>Figure S27.</b> | <sup>1</sup> H NMR of 3,8-bis(2-methoxybenzylidene)-2,7-dioxaspiro[4.4]nonane-1,6-dione ( <b>5n</b> )                     | S16 |
| <b>Figure S28.</b> | <sup>1</sup> H NMR of 3,8-bis(2-methoxybenzylidene)-2,7-dioxaspiro[4.4]nonane-1,6-dione ( <b>5n</b> )                     | S16 |

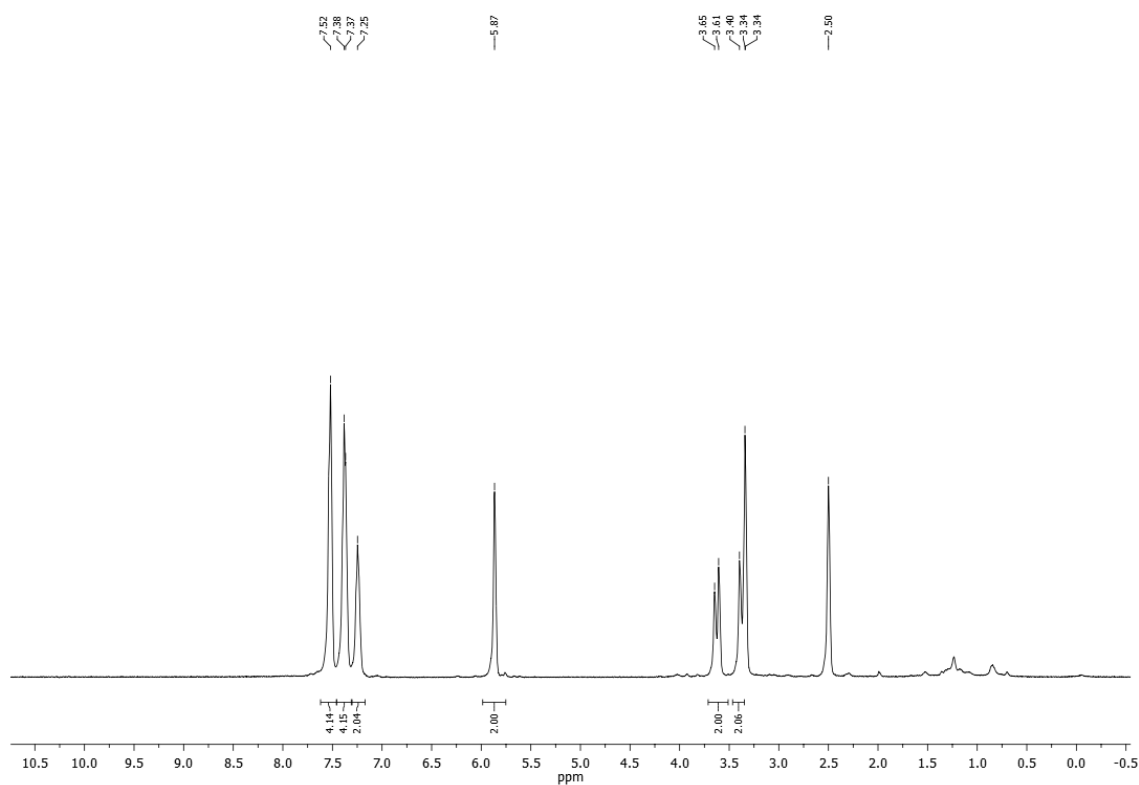

**Figure S1.** <sup>1</sup>H NMR of 3,8-dibenzylidene-2,7-dioxaspiro[4.4]nonane-1,6-dione (**5a**).

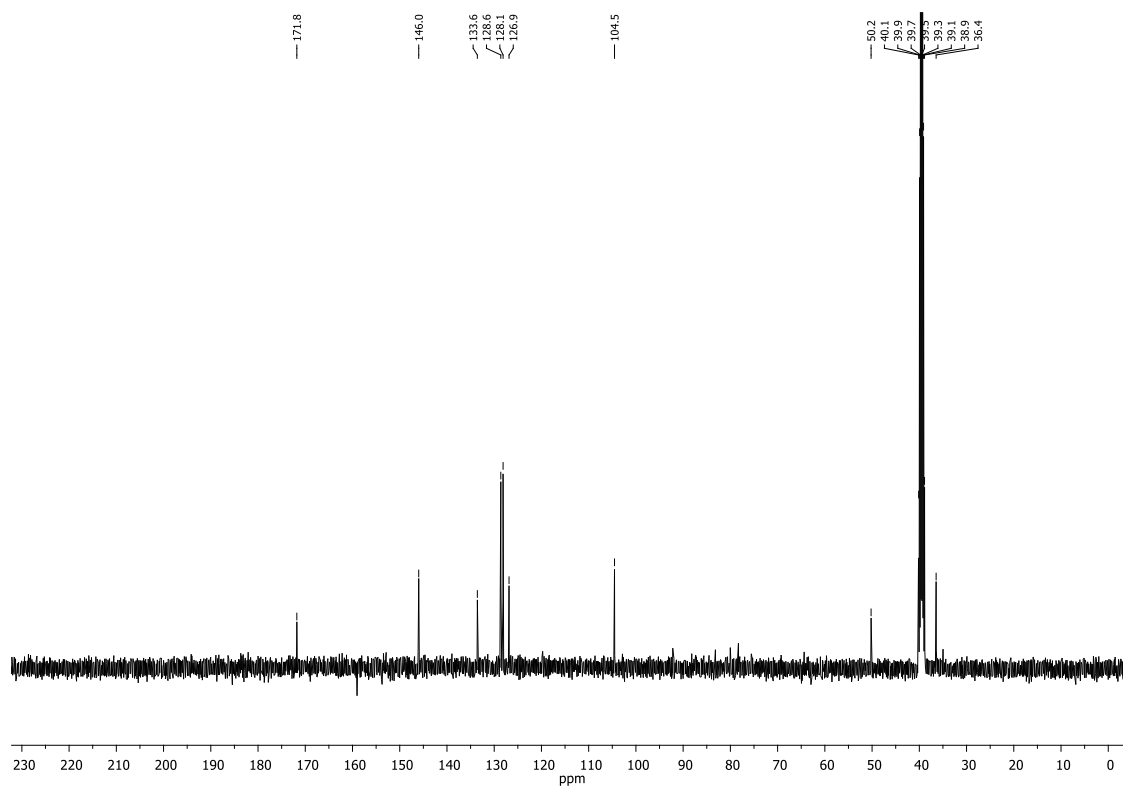

**Figure S2.** <sup>13</sup>C NMR of 3,8-dibenzylidene-2,7-dioxaspiro[4.4]nonane-1,6-dione (**5a**).

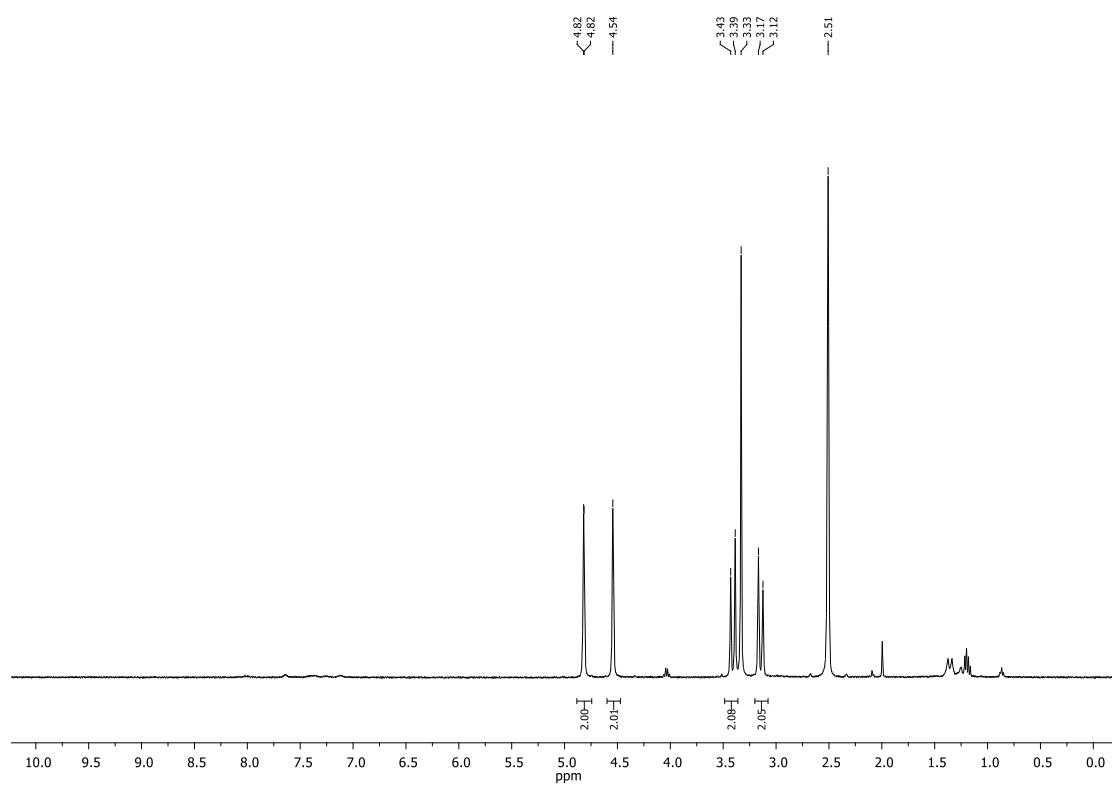

**Figure S3.** <sup>1</sup>H NMR of 3,8-dimethylene-2,7-dioxaspiro[4.4]nonane-1,6-dione (**5b**).

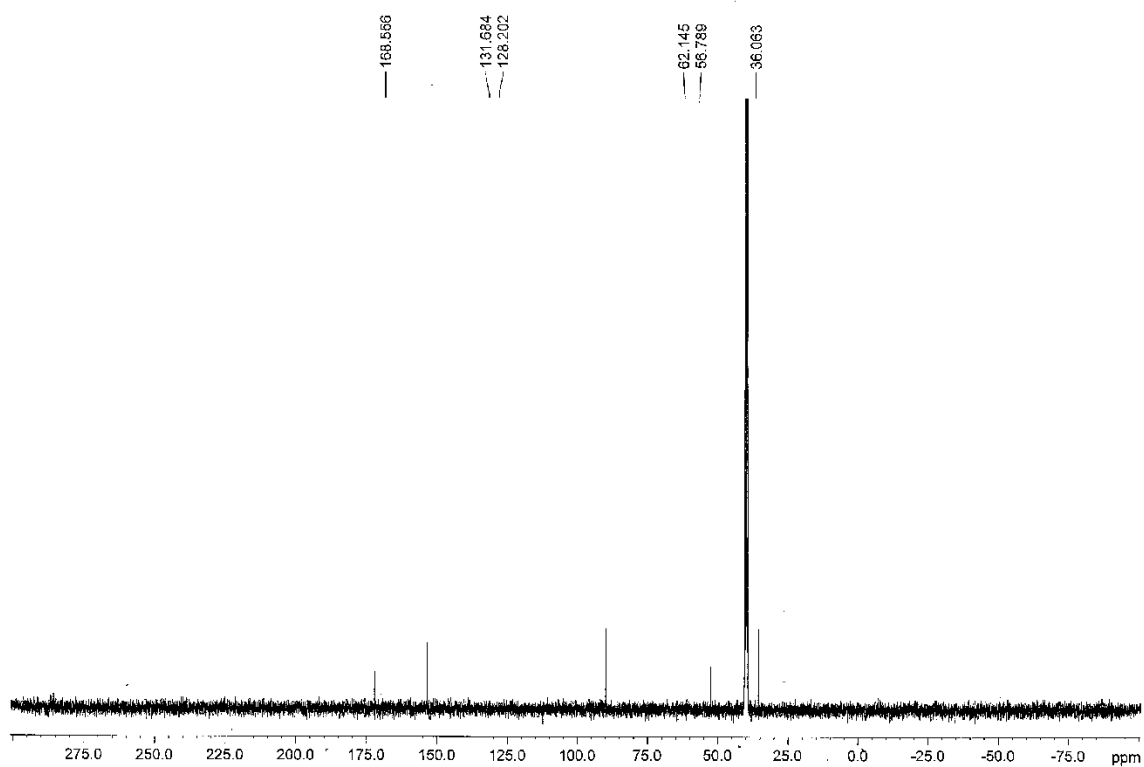

**Figure S4.** <sup>13</sup>C NMR of 3,8-dimethylene-2,7-dioxaspiro[4.4]nonane-1,6-dione (**5b**).

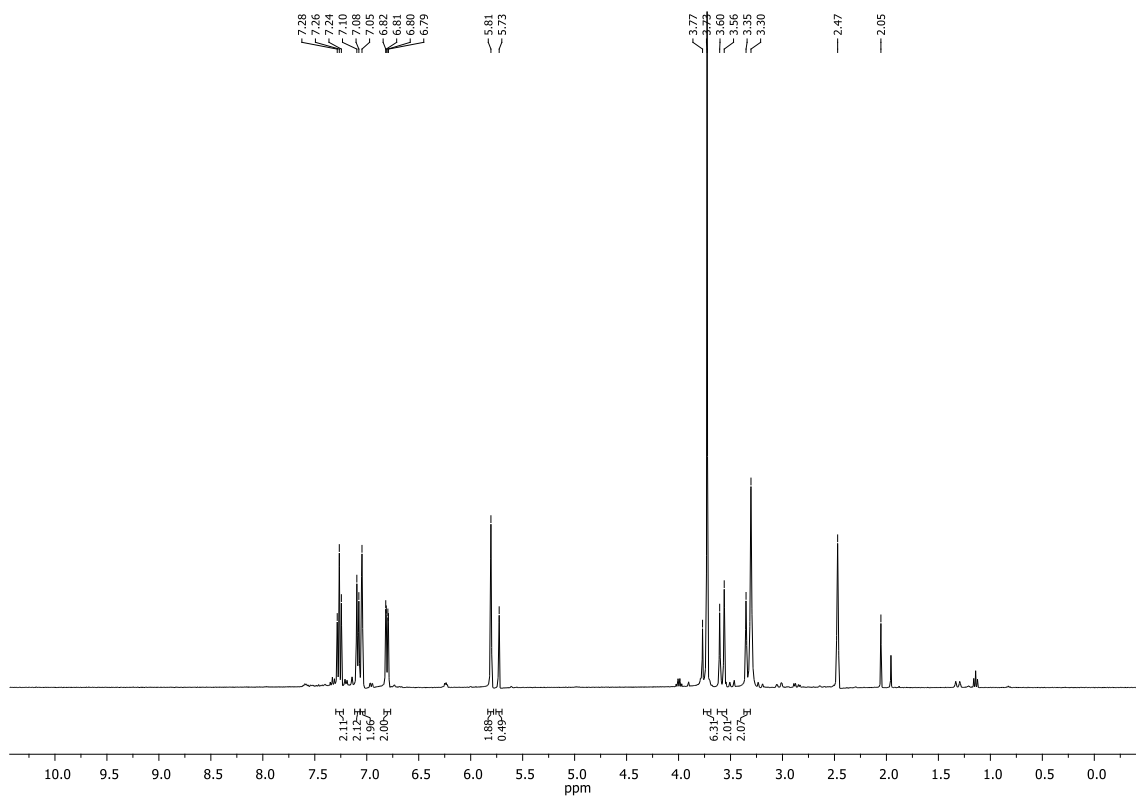

**Figure S5.** <sup>1</sup>H NMR of 3,8-bis(4-methoxybenzylidene)-2,7-dioxaspiro[4.4]nonane-1,6-dione (**5c**).

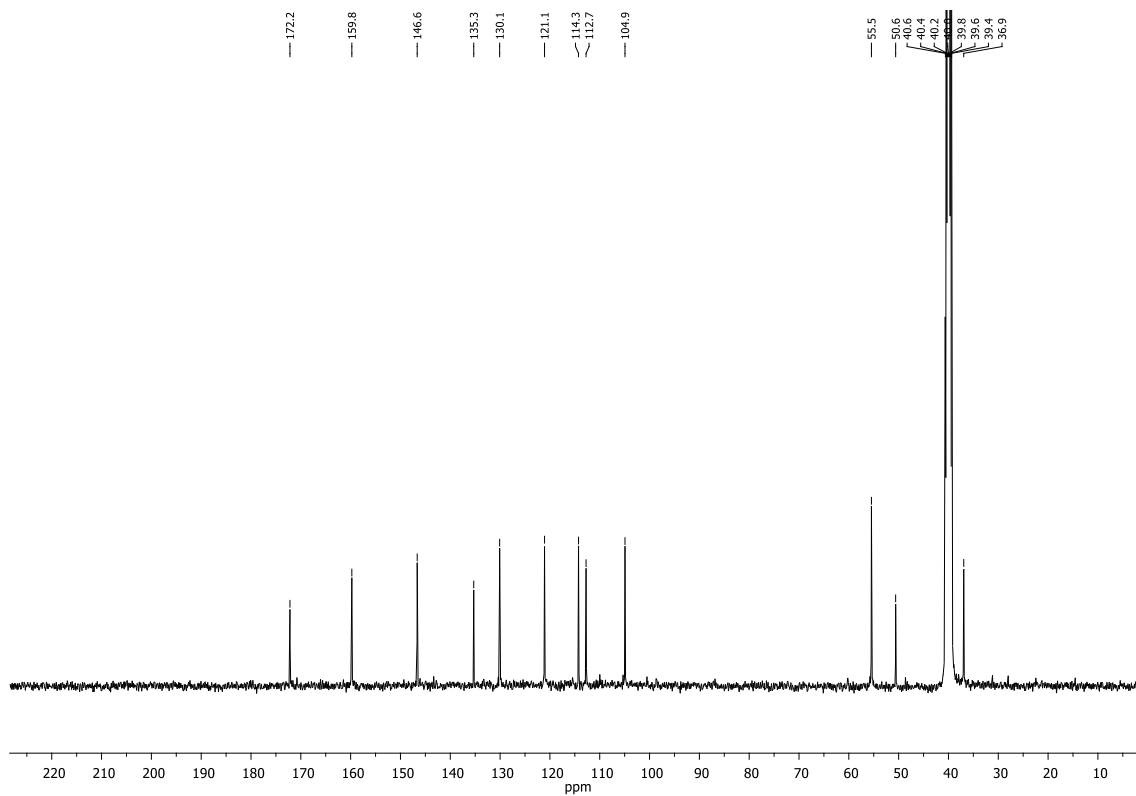

**Figure S6.** <sup>13</sup>C NMR of 3,8-bis(4-methoxybenzylidene)-2,7-dioxaspiro[4.4]nonane-1,6-dione (**5c**).

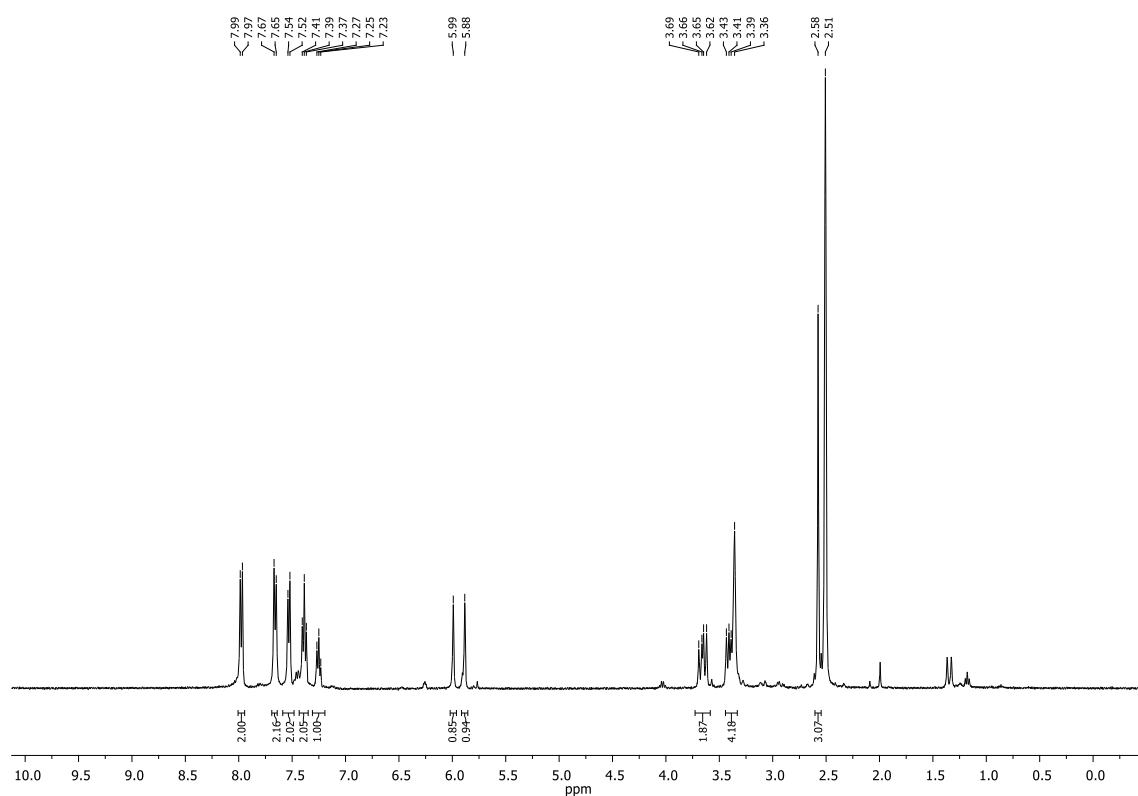

**Figure S7.** <sup>1</sup>H NMR of 3-benzylidene-8-(3-methoxybenzylidene)-2,7-dioxaspiro[4.4]nonane-1,6-dione (**5d**).

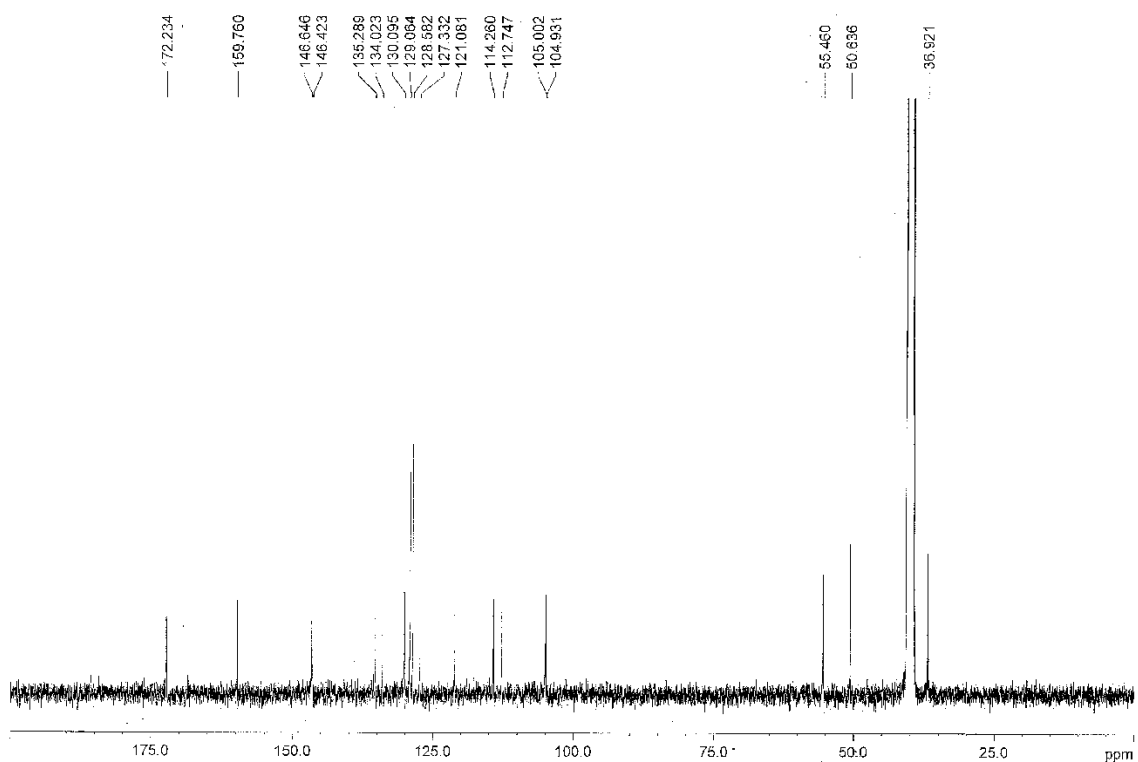

**Figure S8.** <sup>13</sup>C NMR of 3-benzylidene-8-(3-methoxybenzylidene)-2,7-dioxaspiro[4.4]nonane-1,6-dione (**5d**).

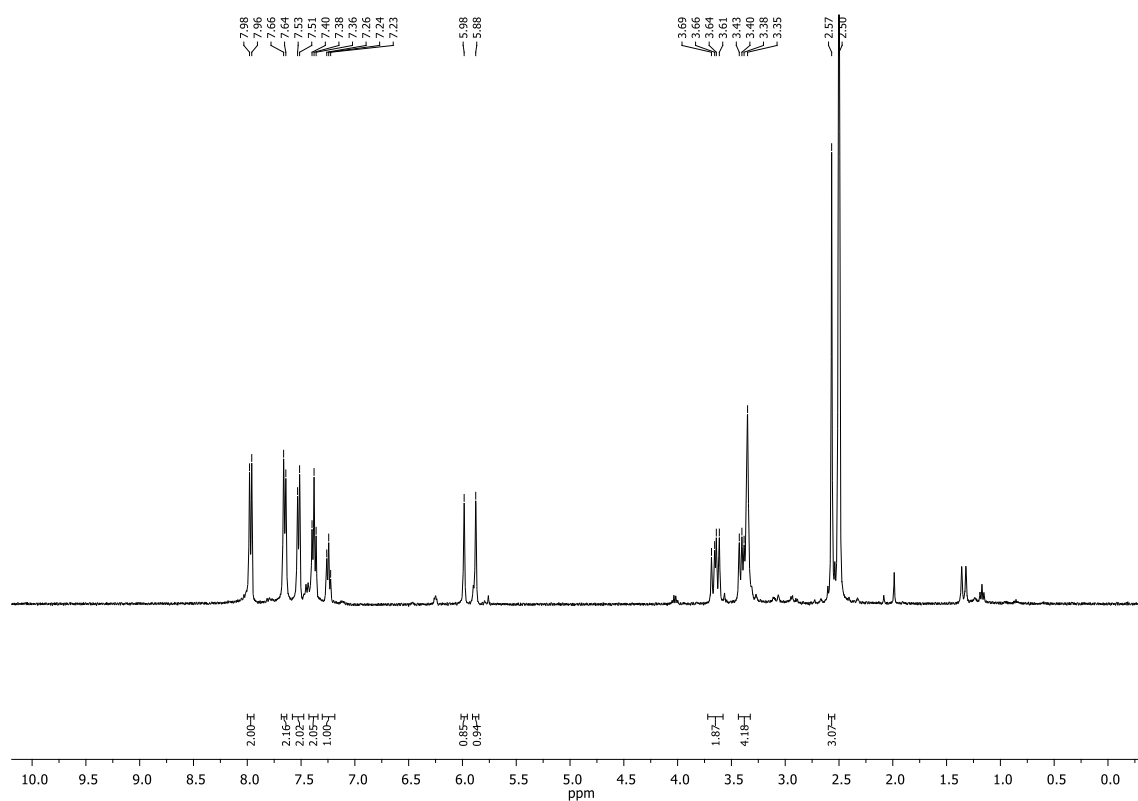

**Figure S9.** <sup>1</sup>H NMR of 3-(4-acetylbenzylidene)-8-benzylidene-2,7-dioxaspiro[4.4]nonane-1,6-dione (**5e**).

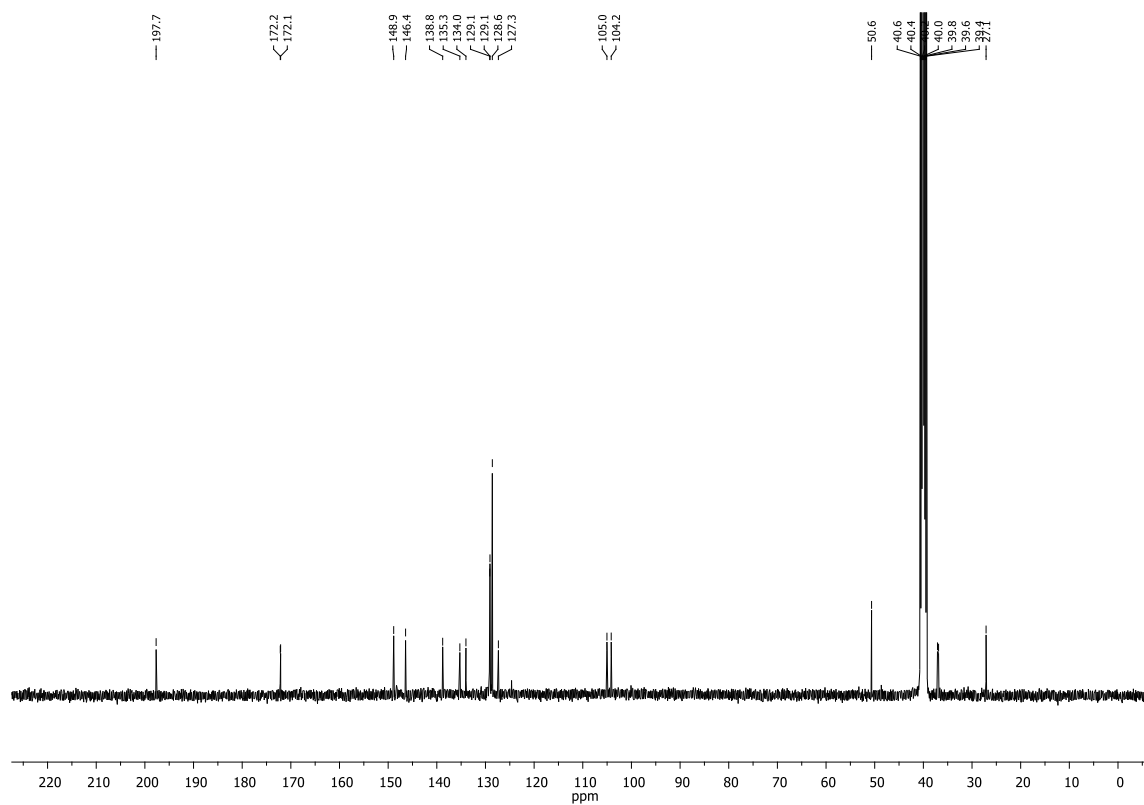

**Figure S10.** <sup>13</sup>C NMR of 3-(4-acetylbenzylidene)-8-benzylidene-2,7-dioxaspiro[4.4]nonane-1,6-dione (**5e**).

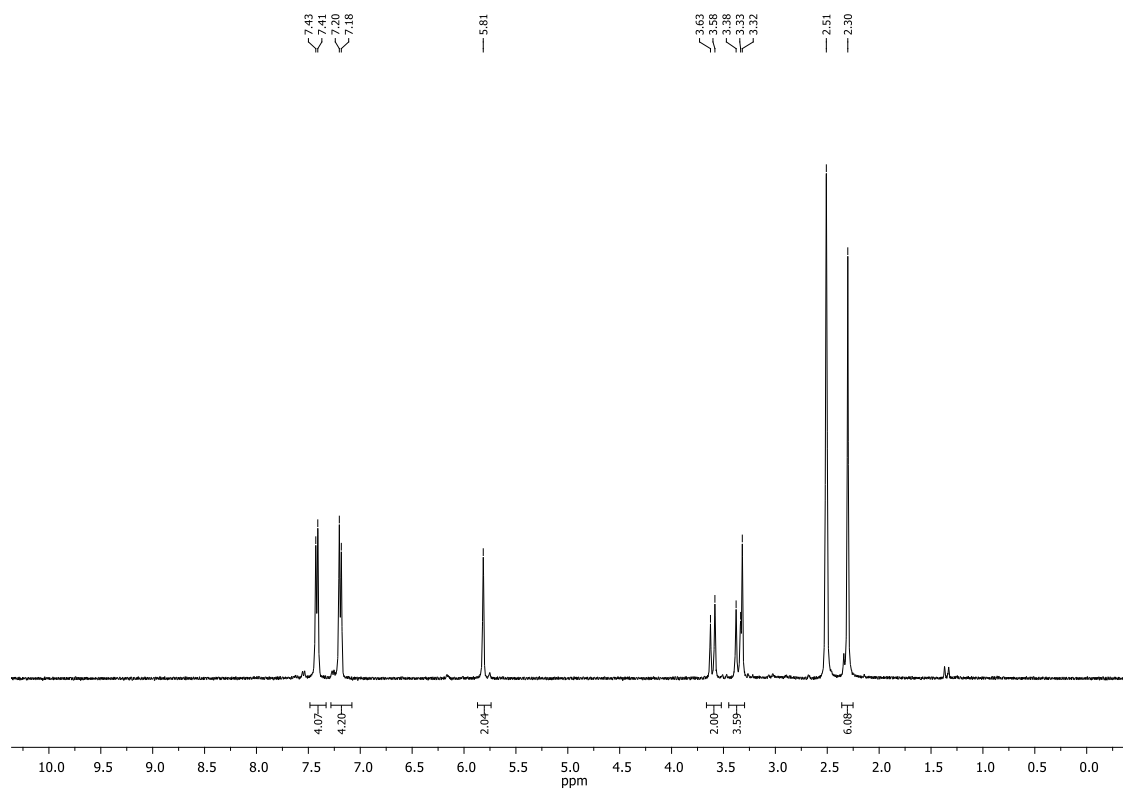

**Figure S11.** <sup>1</sup>H NMR of 3,8-bis(4-methylbenzylidene)-2,7-dioxaspiro[4.4]nonane-1,6-dione (**5f**).

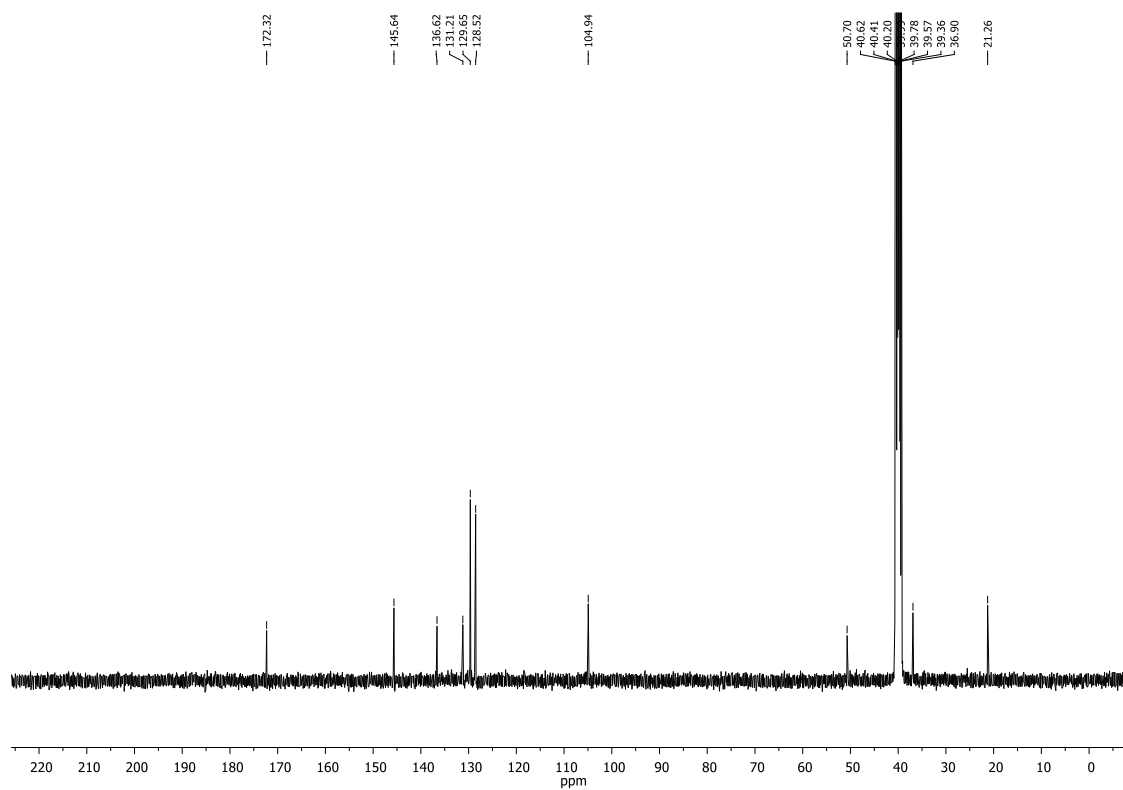

**Figure S12.** <sup>13</sup>C NMR of 3,8-bis(4-methylbenzylidene)-2,7-dioxaspiro[4.4]nonane-1,6-dione (**5f**).



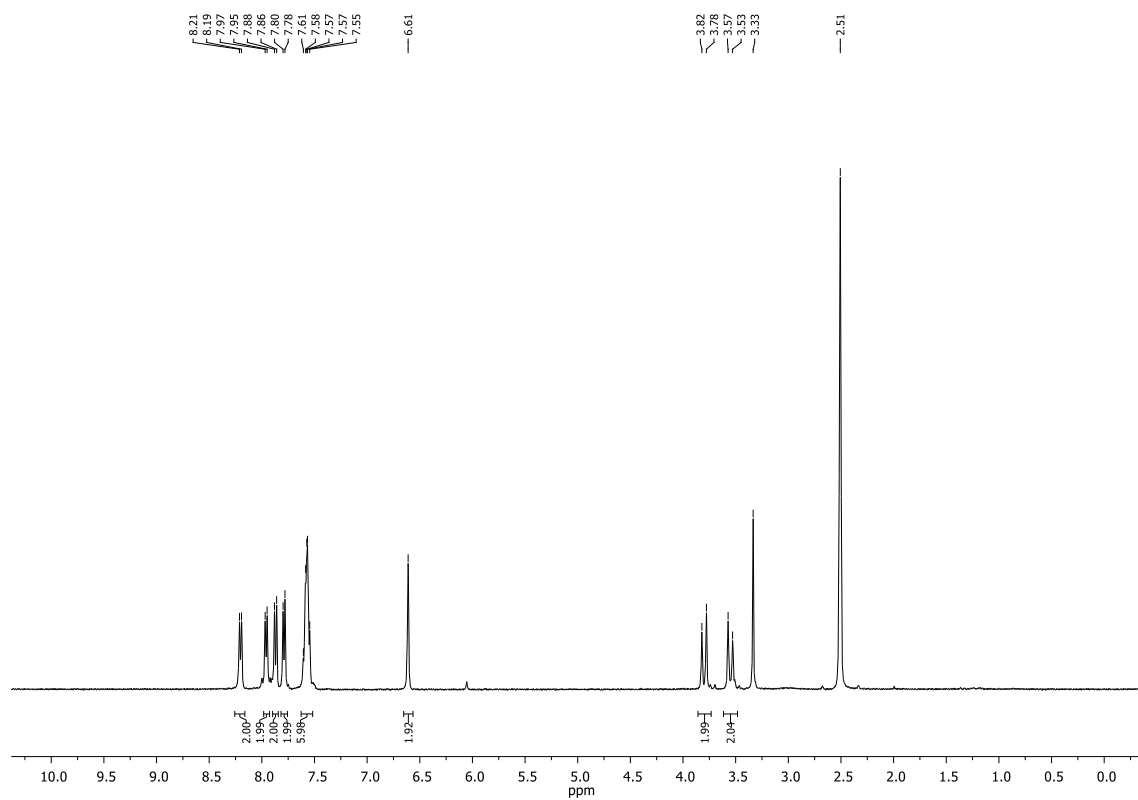

**Figure S13.** <sup>1</sup>H NMR of 3,8-bis(naphthalen-1-ylmethylene)-2,7-dioxaspiro[4.4]nonane-1,6-dione (**5g**).

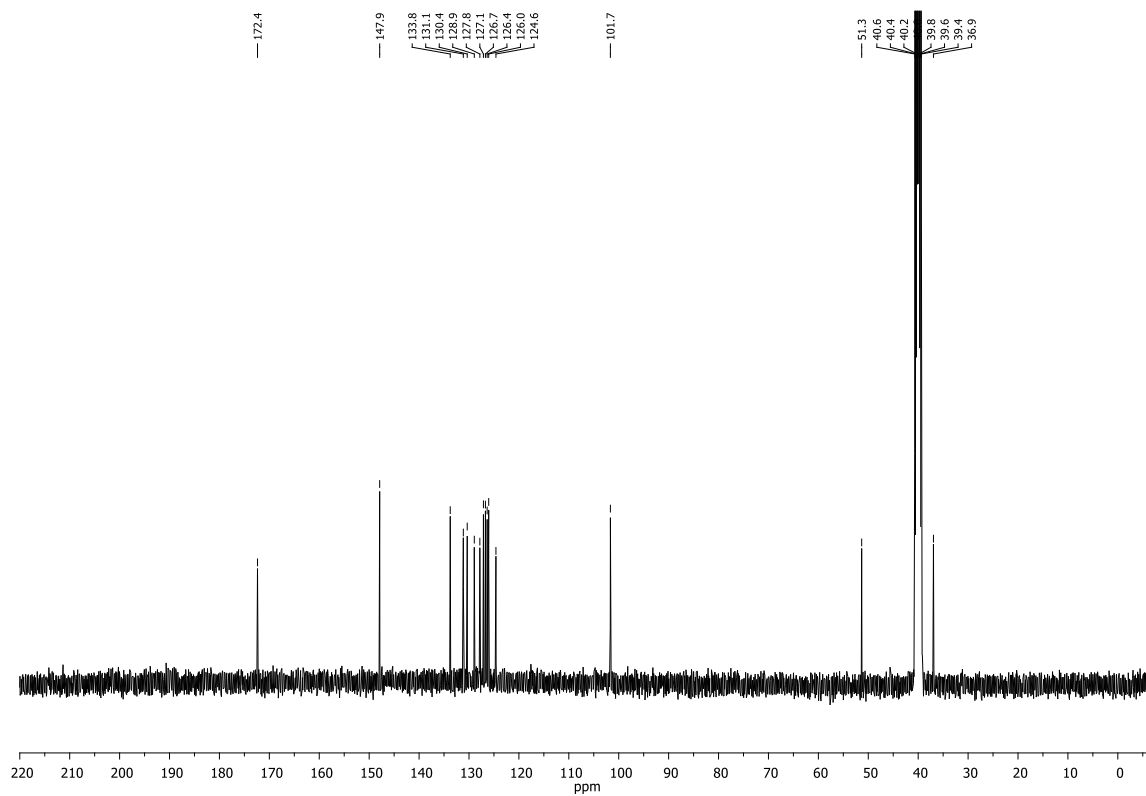

**Figure S14.** <sup>13</sup>C NMR of 3,8-bis(naphthalen-1-ylmethylene)-2,7-dioxaspiro[4.4]nonane-1,6-dione (**5g**).

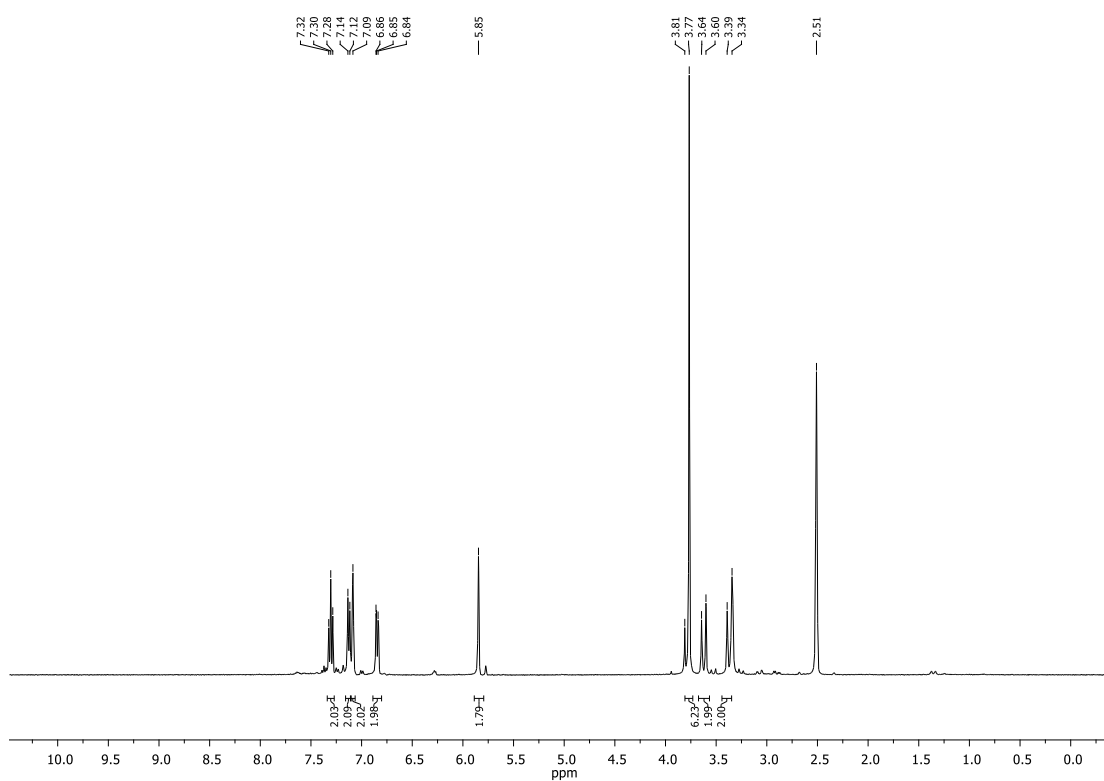

**Figure S15.** <sup>1</sup>H NMR of 3,8-bis(3-methoxybenzylidene)-2,7-dioxaspiro[4.4]nonane-1,6-dione (**5h**).

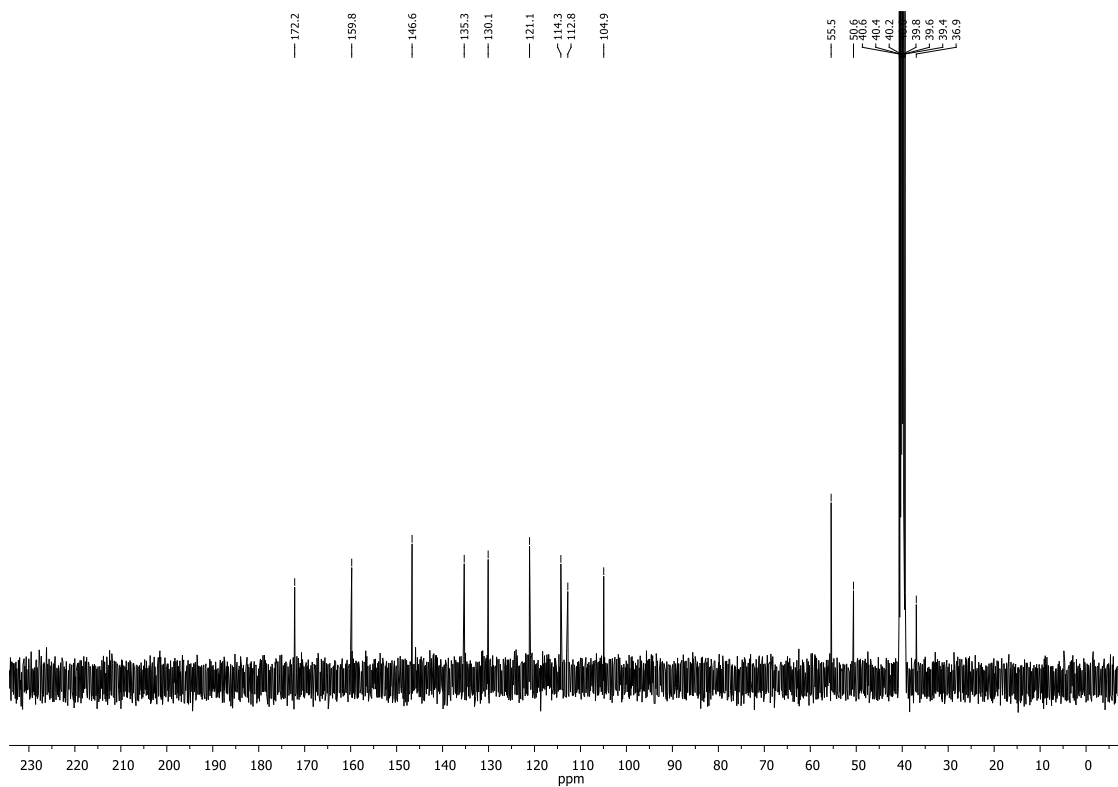

**Figure S16.** <sup>13</sup>C NMR of 3,8-bis(3-methoxybenzylidene)-2,7-dioxaspiro[4.4]nonane-1,6-dione (**5h**).

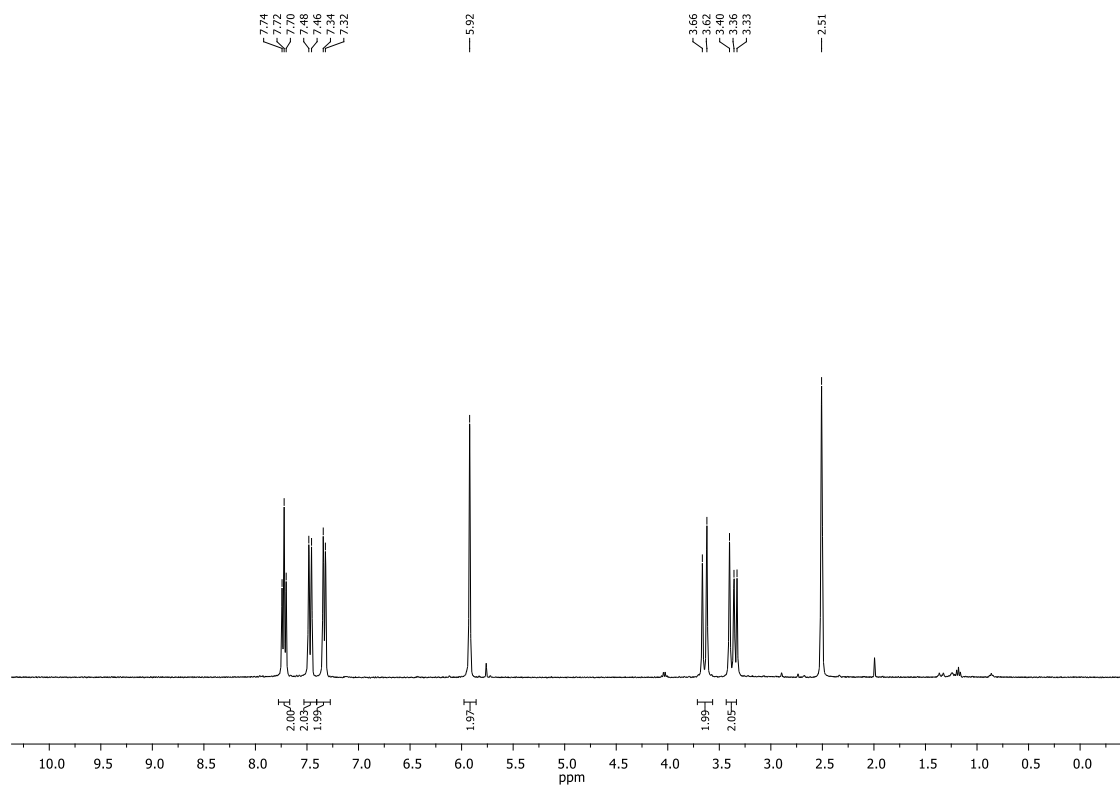

**Figure S17.** <sup>1</sup>H NMR of 3,8-bis(4-bromo-3-fluorobenzylidene)-2,7-dioxaspiro[4.4]nonane-1,6-dione (**5i**).

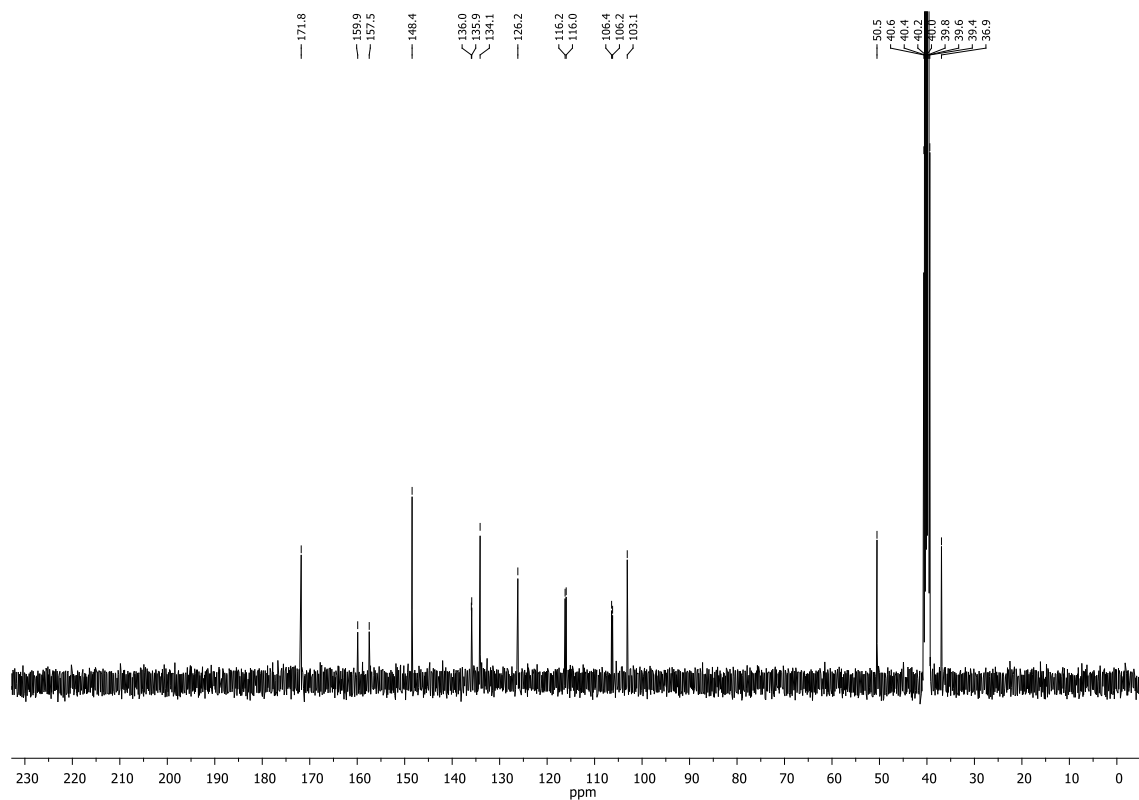

**Figure S18.** <sup>13</sup>C NMR of 3,8-bis(4-bromo-3-fluorobenzylidene)-2,7-dioxaspiro[4.4]nonane-1,6-dione (**5i**).

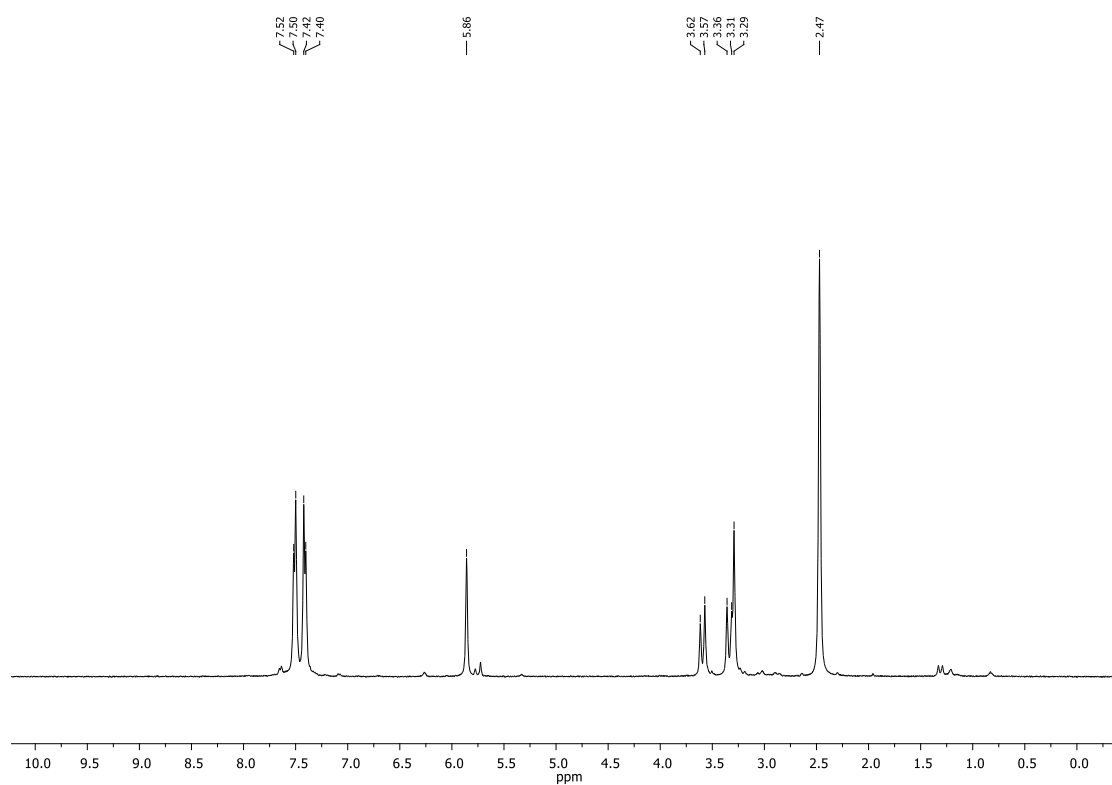

**Figure S19.**  $^1\text{H}$  NMR of 3,8-bis(4-chlorobenzylidene)-2,7-dioxaspiro[4.4]nonane-1,6-dione (**5j**).

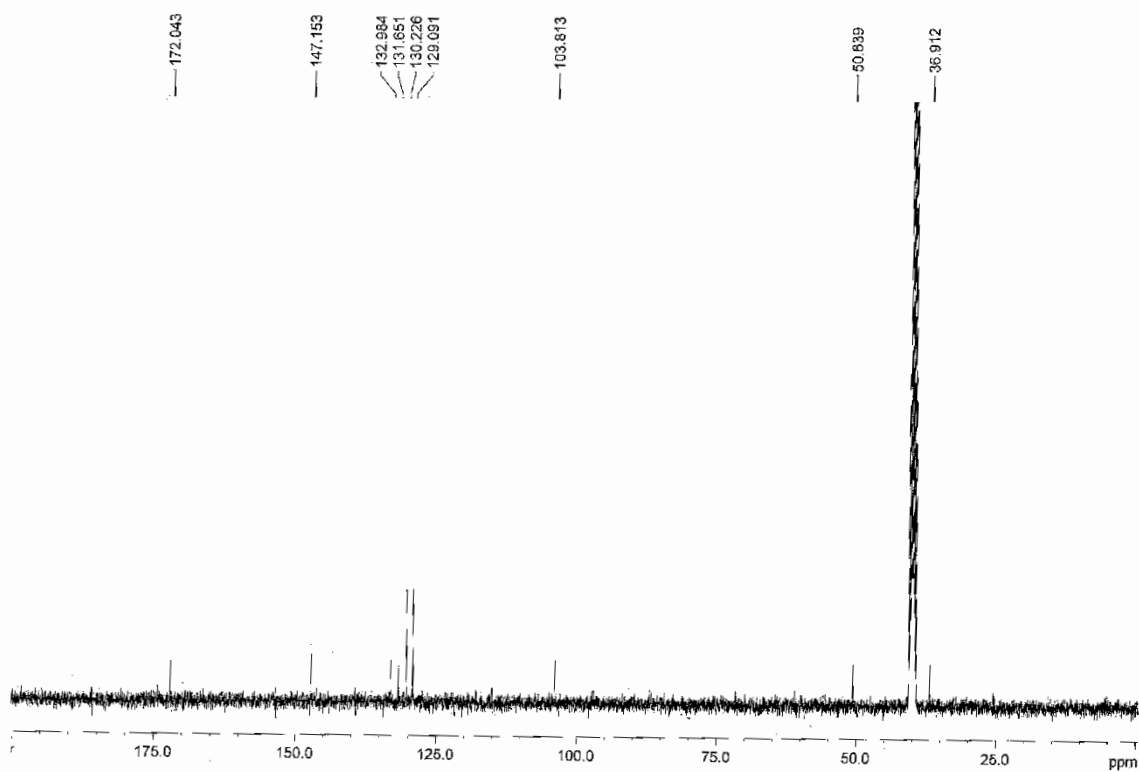

**Figure S20.**  $^{13}\text{C}$  NMR of 3,8-bis(4-chlorobenzylidene)-2,7-dioxaspiro[4.4]nonane-1,6-dione (**5j**).

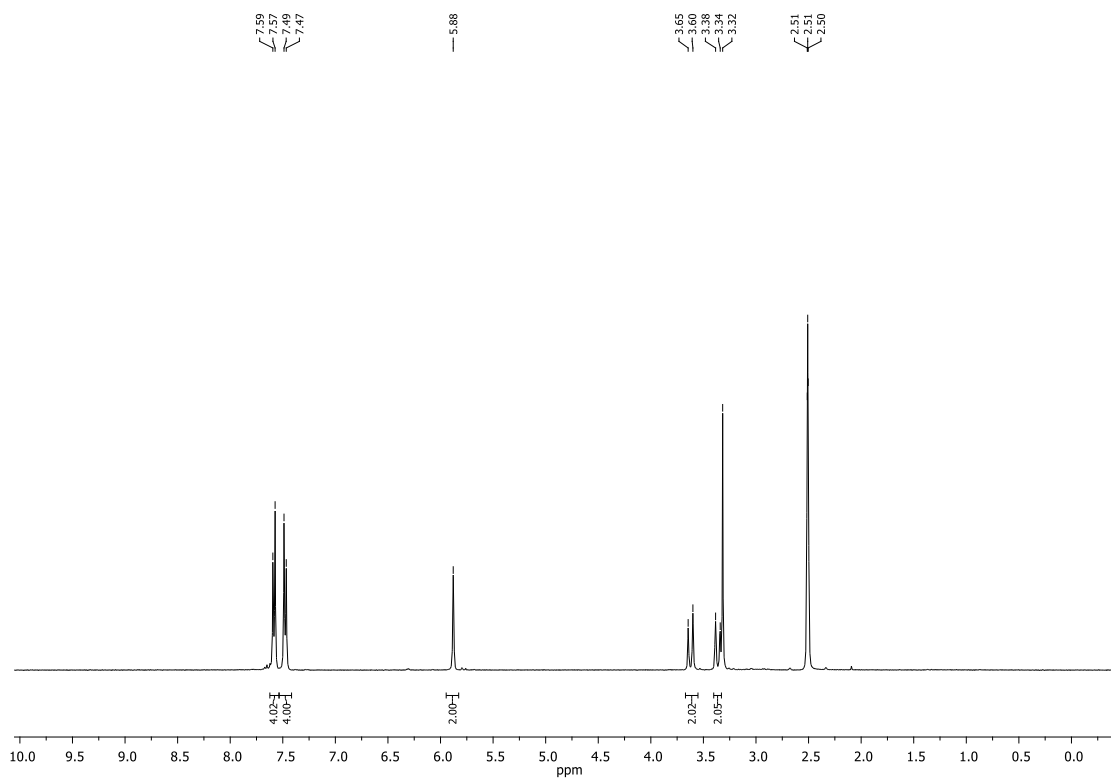

**Figure S21.** <sup>1</sup>H NMR of 3,8-bis(4-bromobenzylidene)-2,7-dioxaspiro[4.4]nonane-1,6-dione (**5k**).

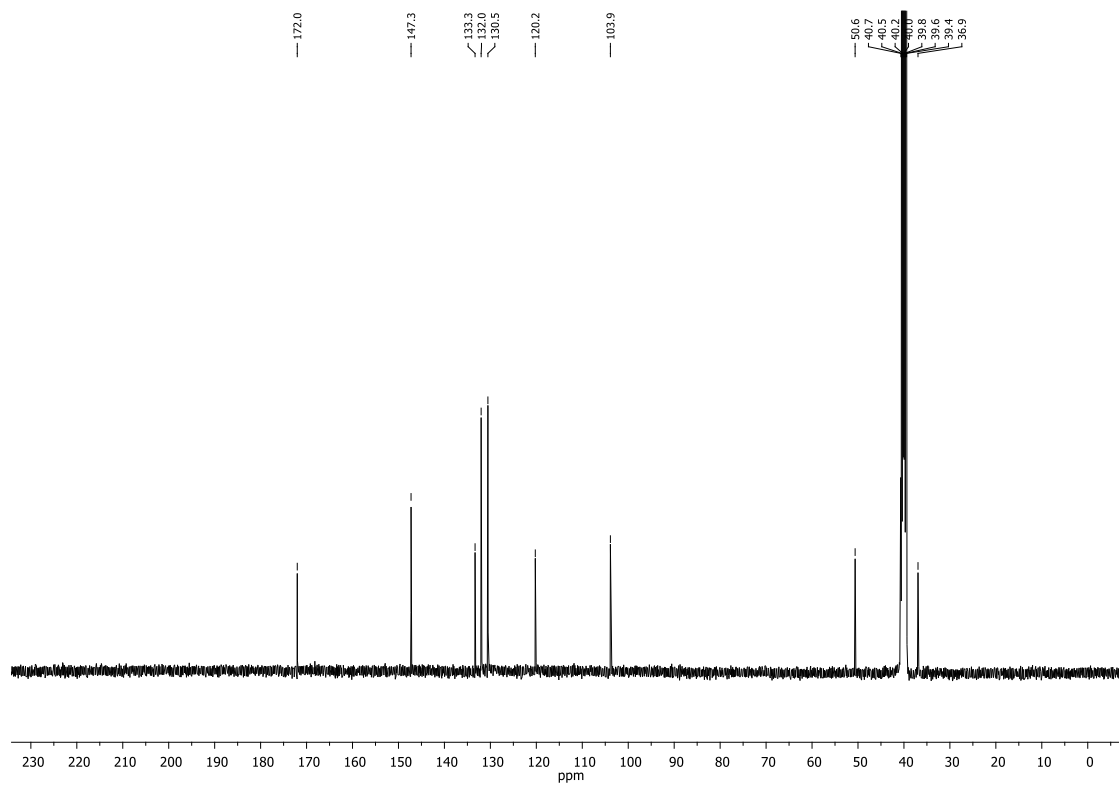

**Figure S22.** <sup>13</sup>C NMR of 3,8-bis(4-bromobenzylidene)-2,7-dioxaspiro[4.4]nonane-1,6-dione (**5k**).

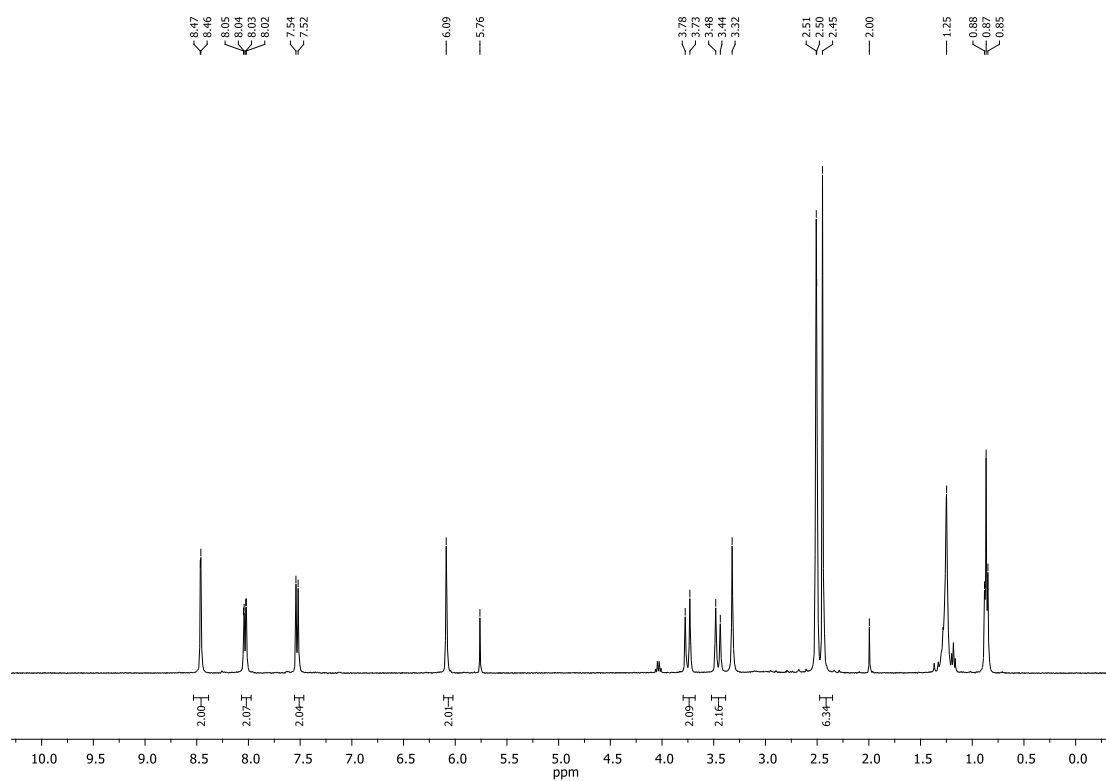

**Figure S23.** <sup>1</sup>H NMR of 3,8-bis(2-methyl-5-nitrobenzylidene)-2,7-dioxaspiro[4.4]nonane-1,6-dione (**51**).

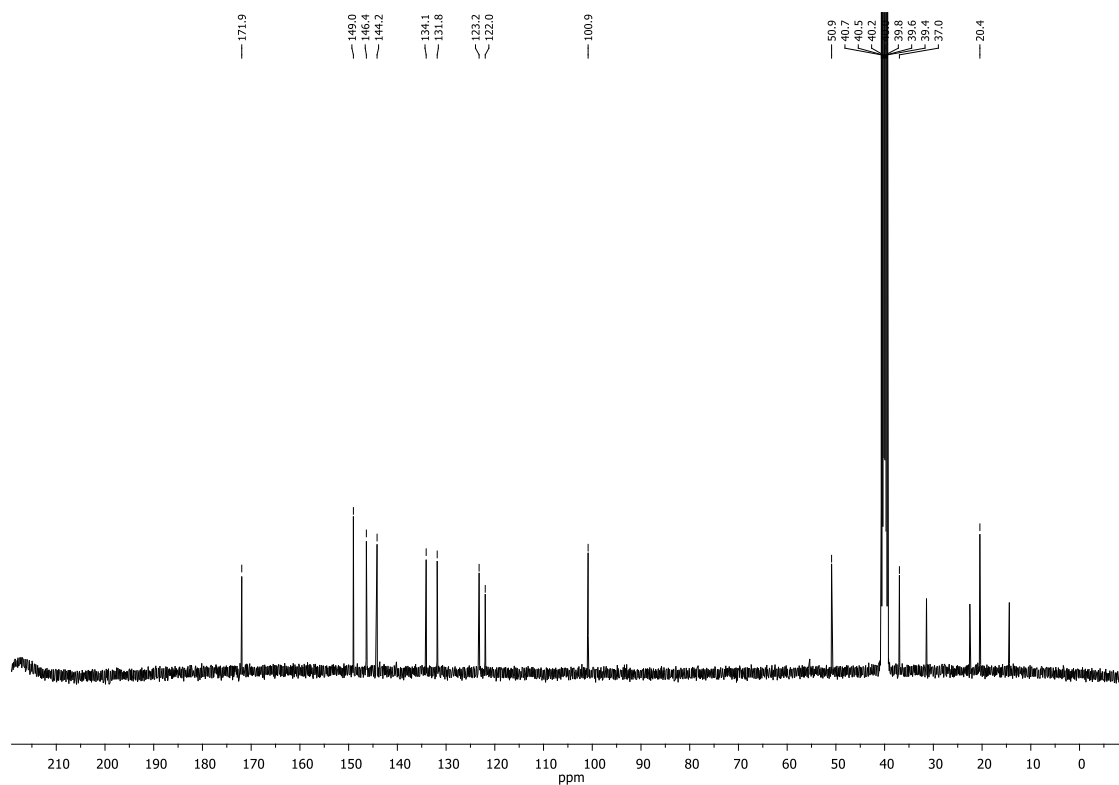

**Figure S24.** <sup>13</sup>C NMR of 3,8-bis(2-methyl-5-nitrobenzylidene)-2,7-dioxaspiro[4.4]nonane-1,6-dione (**51**).

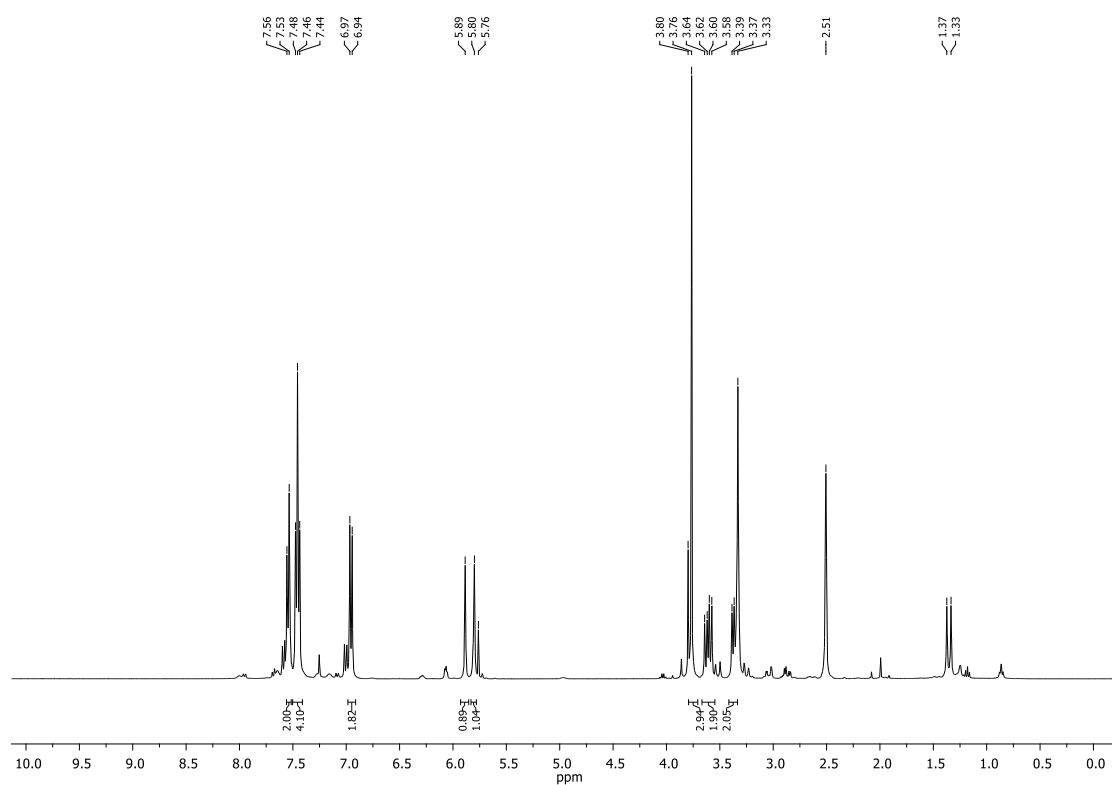

**Figure S25.** <sup>1</sup>H NMR of 3-(4-chlorobenzylidene)-8-(4-methoxybenzylidene)-2,7-dioxaspiro[4.4]nonane-1,6-dione (**5m**).

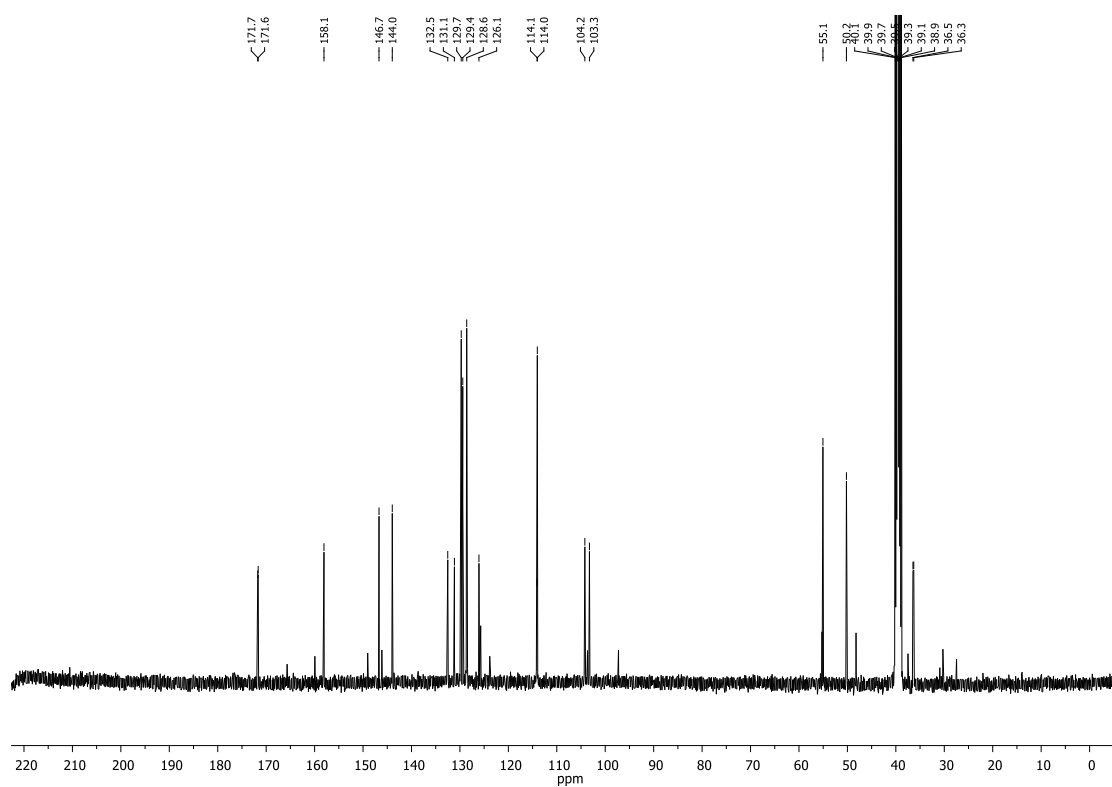

**Figure S26.** <sup>13</sup>C NMR of 3-(4-chlorobenzylidene)-8-(4-methoxybenzylidene)-2,7-dioxaspiro[4.4]nonane-1,6-dione (**5m**).

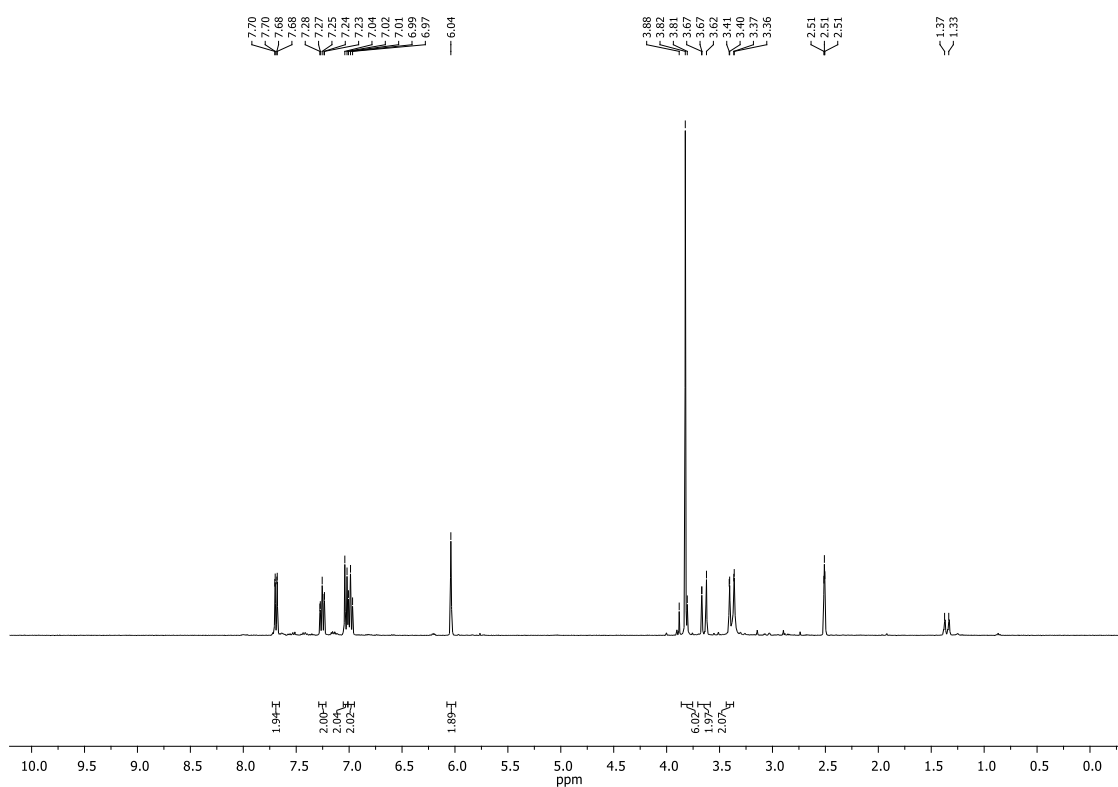

**Figure S27.** <sup>1</sup>H NMR of 3,8-bis(2-methoxybenzylidene)-2,7-dioxaspiro[4.4]nonane-1,6-dione (**5n**).

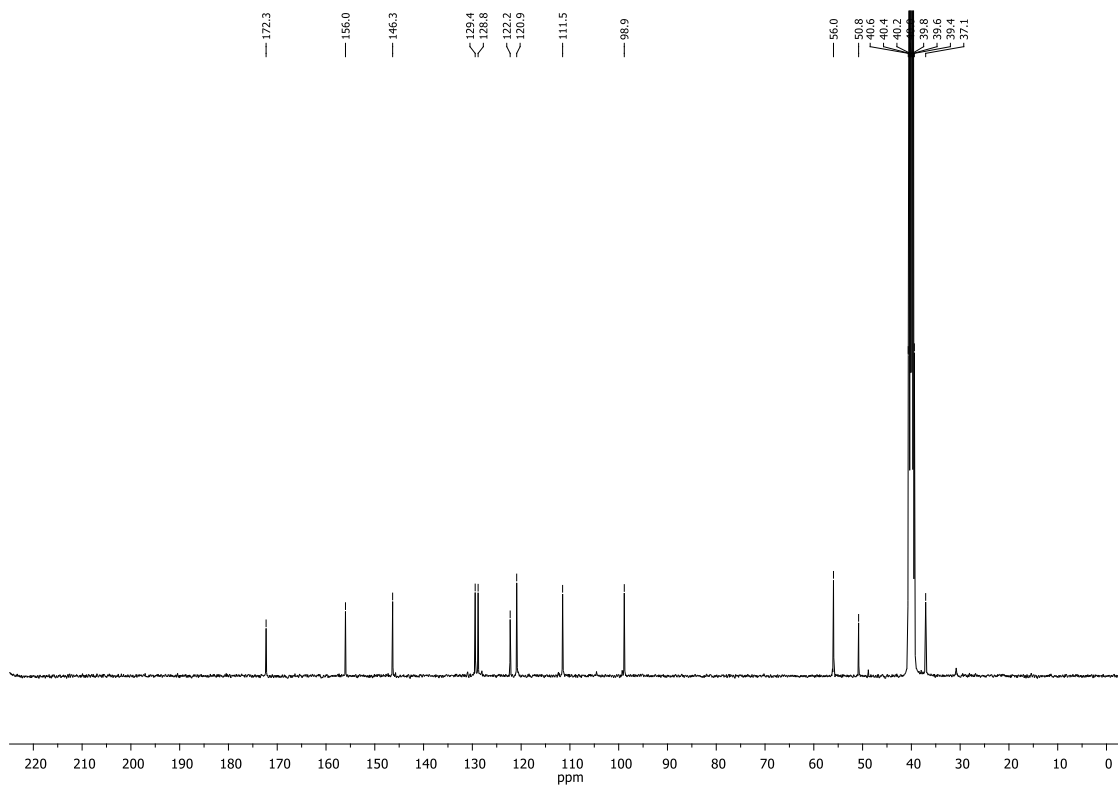

**Figure S28.** <sup>13</sup>C NMR of 3,8-bis(2-methoxybenzylidene)-2,7-dioxaspiro[4.4]nonane-1,6-dione (**5n**).
